# Supplementary material
Source: PubMed Central journal article supplement (PMC7335338)
Supplement: NIHMS1595226-supplement-1.pdf [file NIHMS1595226-supplement-1.pdf]

## **Supplemental Information (SI)**

### **M<sup>6</sup>A demethylase ALKBH5 selectively promotes tumorigenesis and cancer stem cell self-renewal in acute myeloid leukemia**

Chao Shen<sup>1,9</sup>, Yue Sheng<sup>2,9</sup>, Allen Zhu<sup>3,9</sup>, Sean Robinson<sup>1,9</sup>, Xi Jiang<sup>1,4,9</sup>, Lei Dong<sup>1,9</sup>, Huiying Chen<sup>1,9</sup>, Rui Su<sup>1</sup>, Zhe Yin<sup>1,5</sup>, Wei Li<sup>1</sup>, Xiaolan Deng<sup>1</sup>, Yinhuai Chen<sup>6</sup>, Yueh-Chiang Hu<sup>6</sup>, Hengyou Weng<sup>1</sup>, Huilin Huang<sup>1</sup>, Emily Prince<sup>1</sup>, Christopher R Cogle<sup>2</sup>, Miao Sun<sup>7</sup>, Bin Zhang<sup>8</sup>, Chun-Wei Chen<sup>1</sup>, Guido Marcucci<sup>8</sup>, Chuan He<sup>3\*</sup>, Zhijian Qian<sup>2\*</sup>, and Jianjun Chen<sup>1,10\*</sup>

#### **I. Supplemental Figures**

Figure S1 (related to Figure 1)

Figure S2 (related to Figure 2)

Figure S3 (related to Figure 3)

Figure S4 (related to Figure 4)

Figure S5 (related to Figure 5)

Figure S6 (related to Figure 6)

Figure S7 (related to Figure 7)

#### **II. Supplemental Table**

Table S1 (List of 18 highly confident potential targets of ALKBH5)

Table S2 (List of oligonucleotides of primers or sgRNAs)

# SUPPLEMENTAL FIGURES

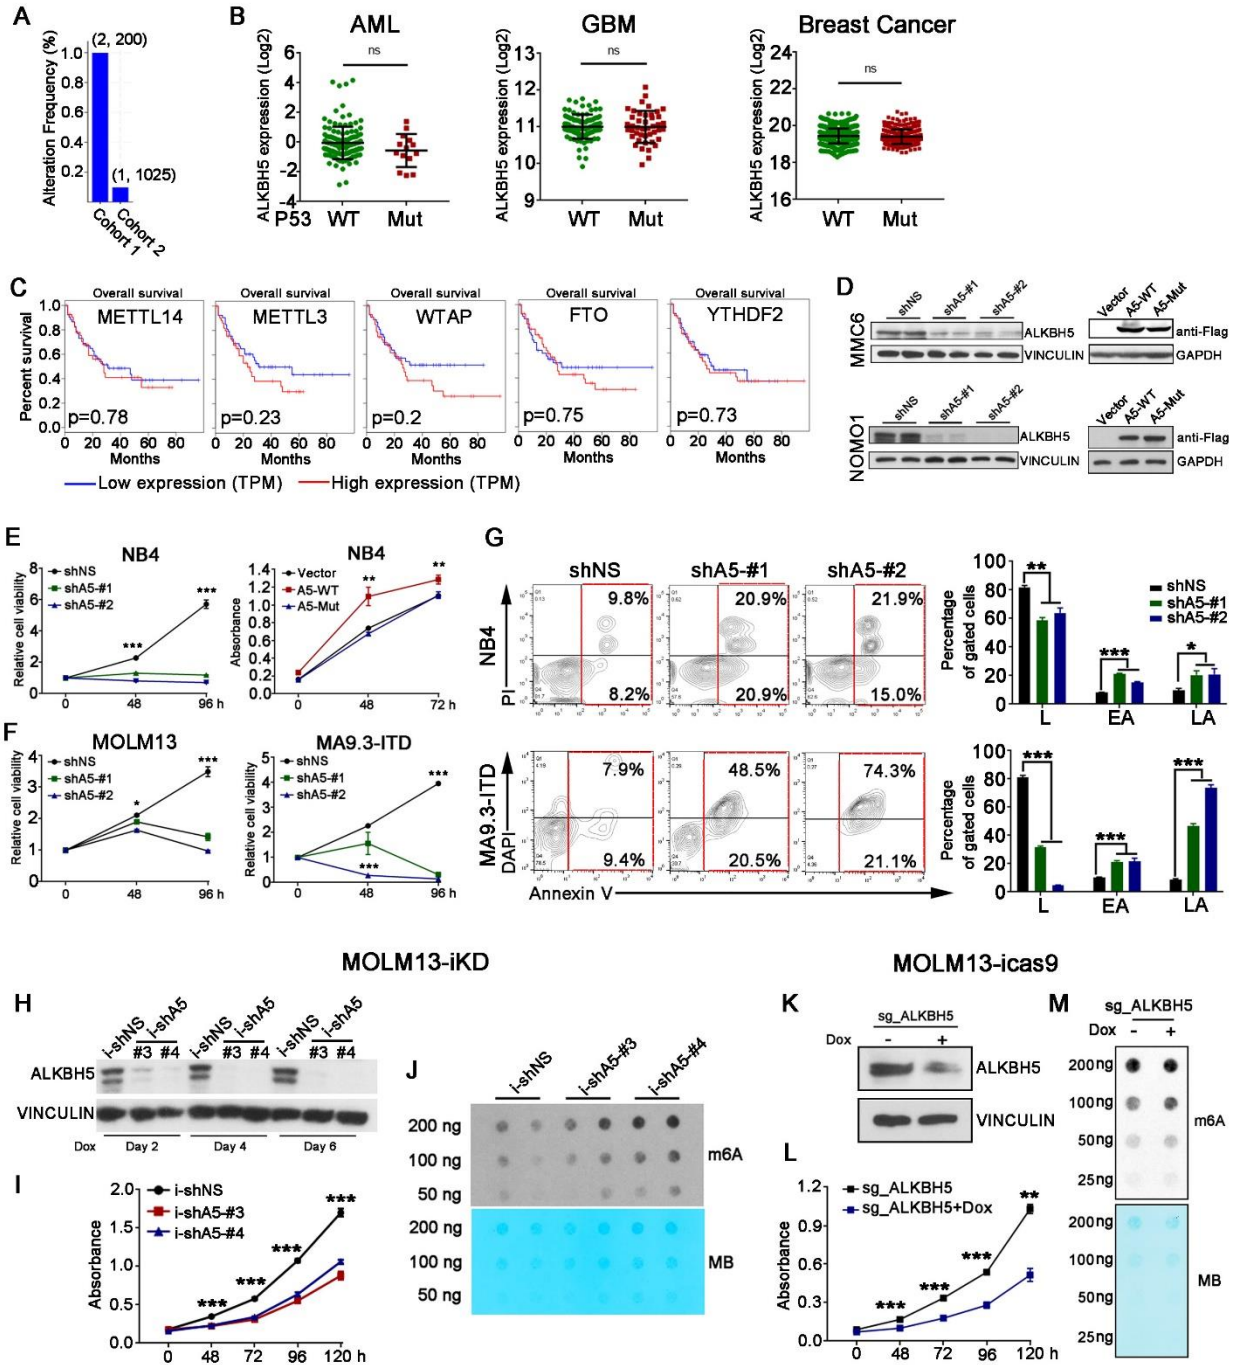

**Figure S1 (related to Figure 1). The expression patterns of *ALKBH5* in human AML and effects of *ALKBH5* expression manipulation on the growth/proliferation of human AML cells.**

(A) The frequency of *ALKBH5* deletion (only deep depletion was considered, as shallow depletion might not be accurate, according to the databases' instruction) in two human AML cohort datasets: the TCGA AML cohort (n=200; cohort 1) and the TARGET AML cohort (n=1,025; cohort 2).

(B) Comparison of *ALKBH5* expression levels between TP53-wild-type (WT) and -mutant (Mut) patients in AML, Glioblastoma (GBM) and Breast cancer datasets. The expression values of *ALKBH5* of the individual samples were log<sub>2</sub>-transformed and then normalized.

(C) Kaplan-Meier survival analysis of correlation of expression levels of a set of m<sup>6</sup>A machinery genes with overall survival (OS) in AML patients based on the TCGA-AML dataset (n=106). The p values were detected by the log-rank test.

(D) Western blotting confirmation of knockdown and forced expression of *ALKBH5* by lentiviral constructs in MMC6 (MONOMAC-6) (P53 Mutant) and NOMO1 (P53 Mutant) cells. shNS, pLKO.1-shNS; shA5-#1, pLKO.1-sh*ALKBH5*-#1; shA5-#2, pLKO.1-sh*ALKBH5*-#2; Vector, empty pCDH vector; A5-WT, pCDH-*ALKBH5*-WT; A5-Mut, pCDH-*ALKBH5*-Mut (a mutant that disrupts its m<sup>6</sup>A demethylase activity). VINCULIN or GAPDH was used as a loading control.

(E) Effects of *ALKBH5* knockdown (left panel) or forced expression (right panel) on the growth/proliferation of human NB4 (P53 mutant) AML cells.

(F) Effects of *ALKBH5* knockdown on the growth/proliferation of human MA9.3-ITD (P53 wild-type) and MOLM13 AML cells (P53 wild-type).

(G) Effects of *ALKBH5* knockdown on apoptosis in NB4 and MA9.3-ITD AML cells. A representative flow cytometry analysis was shown (left panel), and data from three independent experiments was analyzed and compared (right panel).

(H) Western blot detection of *ALKBH5* protein level in Doxycycline induced MOLM13 cells.

(I) Effects of inducible *ALKBH5* knockdown on MOLM13 cell growth/proliferation.

(J) m<sup>6</sup>A dot-blot analysis in inducible *ALKBH5* knockdown MOLM13 cells.

(K) Western blot detection of *ALKBH5* protein level in sg-*ALKBH5* infected MOLM13 cells with or without Doxycycline. VINCULIN was used as a loading control.

(L) The effect of inducible *ALKBH5* knockout on MOLM13 cells growth/proliferation.

(M) m<sup>6</sup>A dot-blot analysis in inducible *ALKBH5* knockout MOLM13 cells.

Mean $\pm$ SD are shown for Figures S1B, E, G (right panel), I and L. \*p < 0.05; \*\*p < 0.01; \*\*\*p < 0.001; ns, no significance; t-test

**A**

***Alkbh5*-WT**

AGGACCCTAGAGTTGAGTTGGCGGGGGCCATGCGGGCCGCCAGCGGCTACACCGACCTGCGGGAGAAGCTCAAGTC  
 CATGACGTCCCGGGACAACACTACAAGCGGGCAGTCGGGAGGCCCGCCGCGTGCGGCCCGCGCGTGGCTGCCGC  
 TGCCGCTGCCCGGGCCGCGCTGAGCCTTACCCGGCGTCCGGGACCACCAAGCGAAATACCAGGAGACTCGGG

***Alkbh5*-Homo (57 bp deletion)**

AGGACCCTAGAGTTGAGTTGGCGGGGGCCATGCGGGCCGCCAGCGGCTACACCGACCTGCGGGAGAAGCTCAAGTC  
 CATGACGTCCCGGGACAACACTACAAGCGGGCAGTCGGGAGGCCCGCCGCGTGC-----  
 -----TCCGGGACCACCAAGCGAAATACCAGGAGACTCGGG

**B**

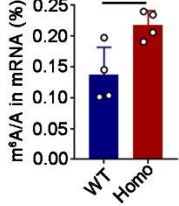

**C**

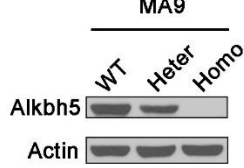

**D**

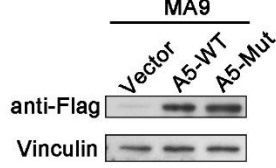

**E**

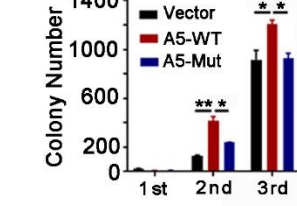

**F**

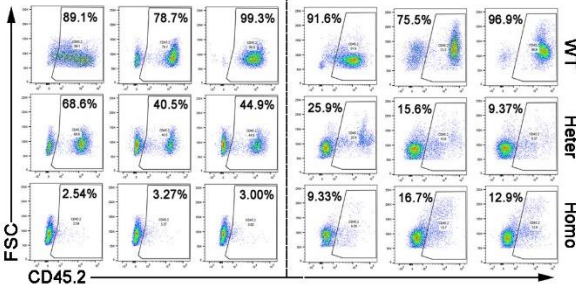

**G**

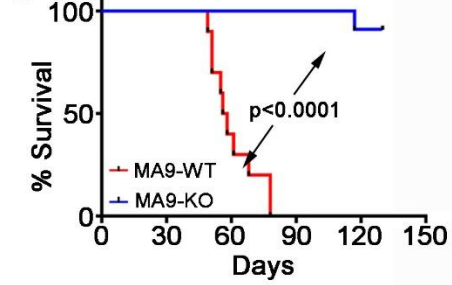

**H**

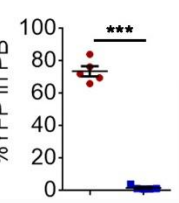

**I**

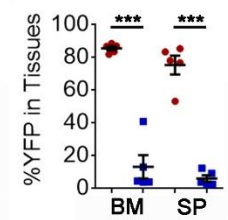

**J**

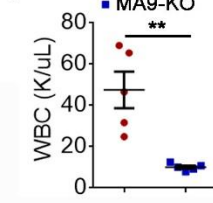

**K**

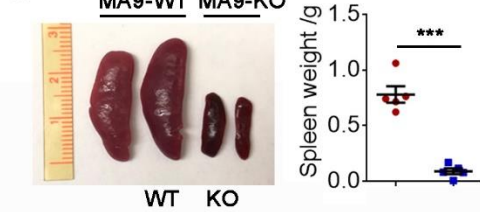

**L**

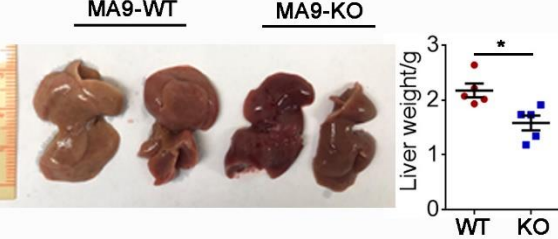

**M**

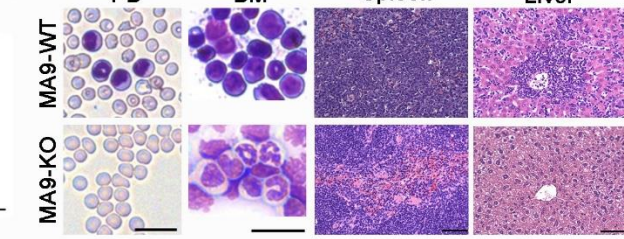

**Figure S2 (related to Figure 2). Role of *Alkbh5* in MLL-AF9 mediated leukemogenesis.**

**(A)** Sanger sequencing of the deletion in *Alkbh5* genomic locus induced by CRISPR-Cas9.

**(B)** LC-MS/MS of mRNA m<sup>6</sup>A abundance in bone marrow (BM) cells collected from *Alkbh5* wild-type (WT) and homozygous knockout (Homo) mice (n=4 for each group).

**(C-D)** The efficiency of knockout of *Alkbh5* **(C)** and overexpression of ALKBH5 wild-type (A5-WT) or mutant (A5-Mut) **(D)** in the colony-formation assays (CFA) were confirmed by Western blots. Actin or Vinculin was used as a loading control.

**(E)** *Alkbh5* wild-type BM lin<sup>-</sup> cells were virally co-transduced with MLL-AF9 (MA9) together with an empty vector (Vector), wild-type ALKBH5 (A5-WT) or mutant (A5-Mut) and then conducted colony-forming/replating assays. Colony forming cell counts at each round of plating are shown (n=3 technical replicates per sample).

**(F)** Three mice from each primary bone marrow transplantation (BMT) group were euthanized at the same time (day 61 post-BMT) for AML progression analysis. These are the original flow plots for the peripheral blood (PB) and BM engraftment analysis shown in Figure 2H-I.

**(G-M)** Effects of *Alkbh5* knockout on MA9-induced primary leukemogenesis. BM lin<sup>-</sup> cells from *Alkbh5* wild-type or homozygous knockout mice were virally transduced with MA9-YFP retrovirus, (namely MA9-WT or MA9-KO), and then transplanted into primary recipient mice. **(G)** Survive curves of the recipients (MA9-WT, n=10; MA9-KO, n=11). **(H-M)** Five mice from each transplant group were euthanized at the same time (day 42 post-BMT), and the engraftment (percentage of YFP<sup>+</sup> cells) in PB **(H)** and in BM and spleen **(I)**, WBC counts **(J)**, and the size and weight of spleen **(K)** and liver **(L)** were analyzed. The mean ± SD values were shown. **(M)** Representative images of Wright-Giemsa staining of PB and BM, and hematoxylin and eosin (H&E) staining of spleen and liver of the recipient mice. Bar = 20 μm (for PB and BM) or 50 μm (for spleen and liver).

\*p <0.05; \*\*p <0.01; \*\*\*p < 0.001; t-test (for Figures S2B, E, H-L; Mean±SD are shown) or log-rank test (for Figure S2G).

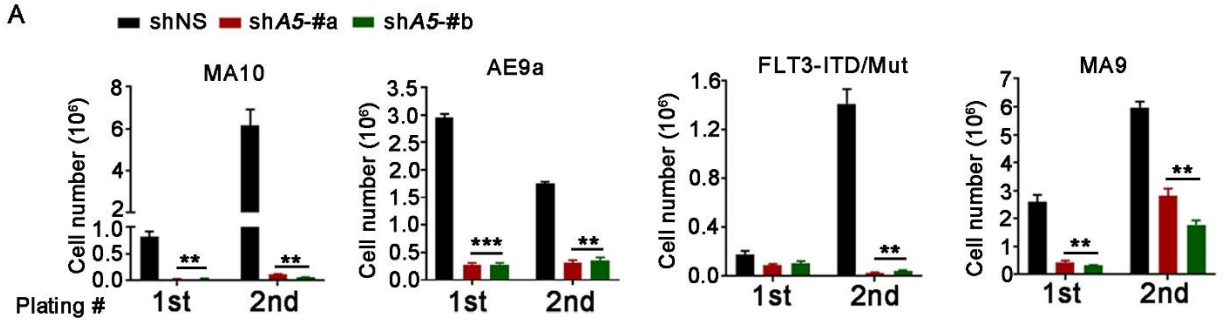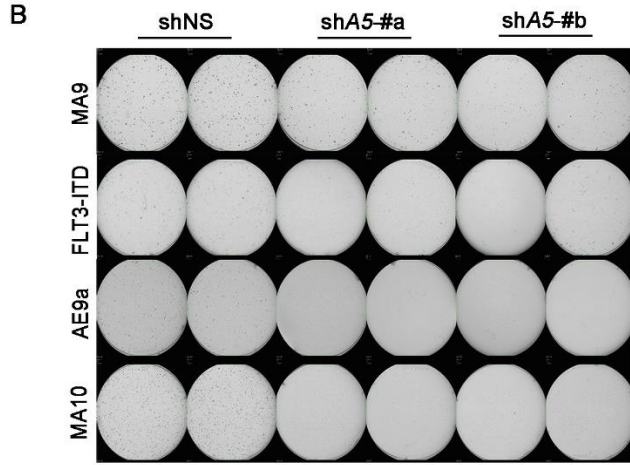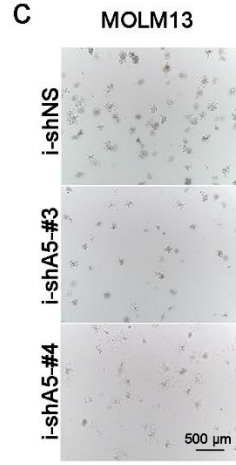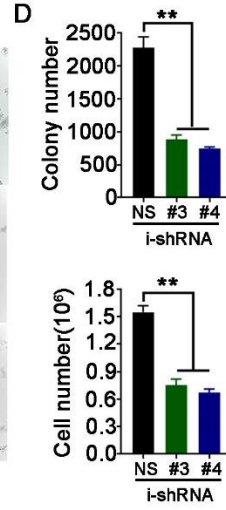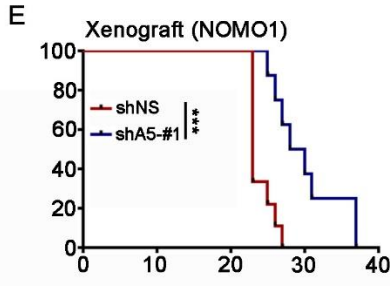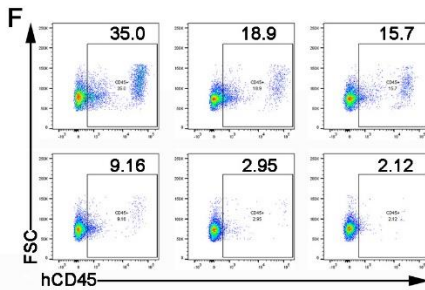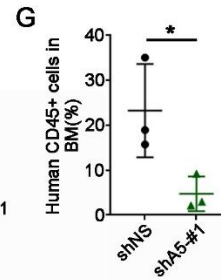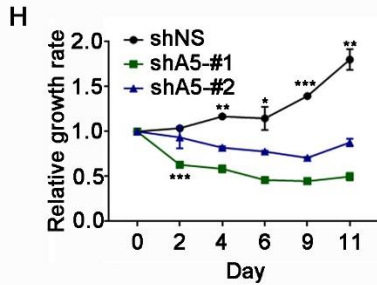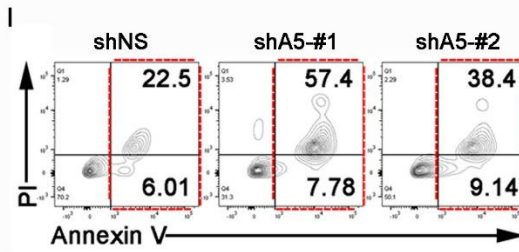

**Figure S3 (related to Figure 3). Knockdown of *ALKBH5* affects the maintenance of human and murine AML.**

(A-B) Effects of *Alkbh5* knockdown on the colony-forming/replating ability of mouse BM leukemia cells. Cell numbers per dish of each round of colony formation (A) and the representative images of whole dishes scanning (B) are shown.

(C-D) Effects of *ALKBH5* inducible knockdown on colony-forming ability of human MOLM13 (TP53 wild-type) AML cells. Representative images of the colonies ten days after the plating (C) and colony numbers and cell numbers per dish (D) are shown.

(E-G) Effect of *ALKBH5* knockdown on the maintenance and progression of human AML *in vivo*. NSGS mice were xeno-transplanted with NOMO1 cells that were lentivirally transduced with shNS (mouse number: n=9) or shALKBH5 (shA5-#1) (n=8), and AML cell engraftment and AML progression were monitored. Kaplan–Meier survival curves of the two groups of recipient mice (E), as well as representative flow analysis of AML cell engraftment (% of human CD45<sup>+</sup> cells in the BM) (F) and the statistic summaries of the engraftment data (G) of moribund recipient mice, were shown.

(H-I) Effects of *ALKBH5* knockdown by shRNAs (shA5-#1 and shA5-#2) on cell growth/proliferation (H) and apoptosis (I) of human primary AML cells (from Patient #3).

\*p < 0.05; \*\*p < 0.01; \*\*\*p < 0.001; t-test (for Figures S3A, D, G-H; Mean±SD are shown) or log-rank test (for Figure S3E).



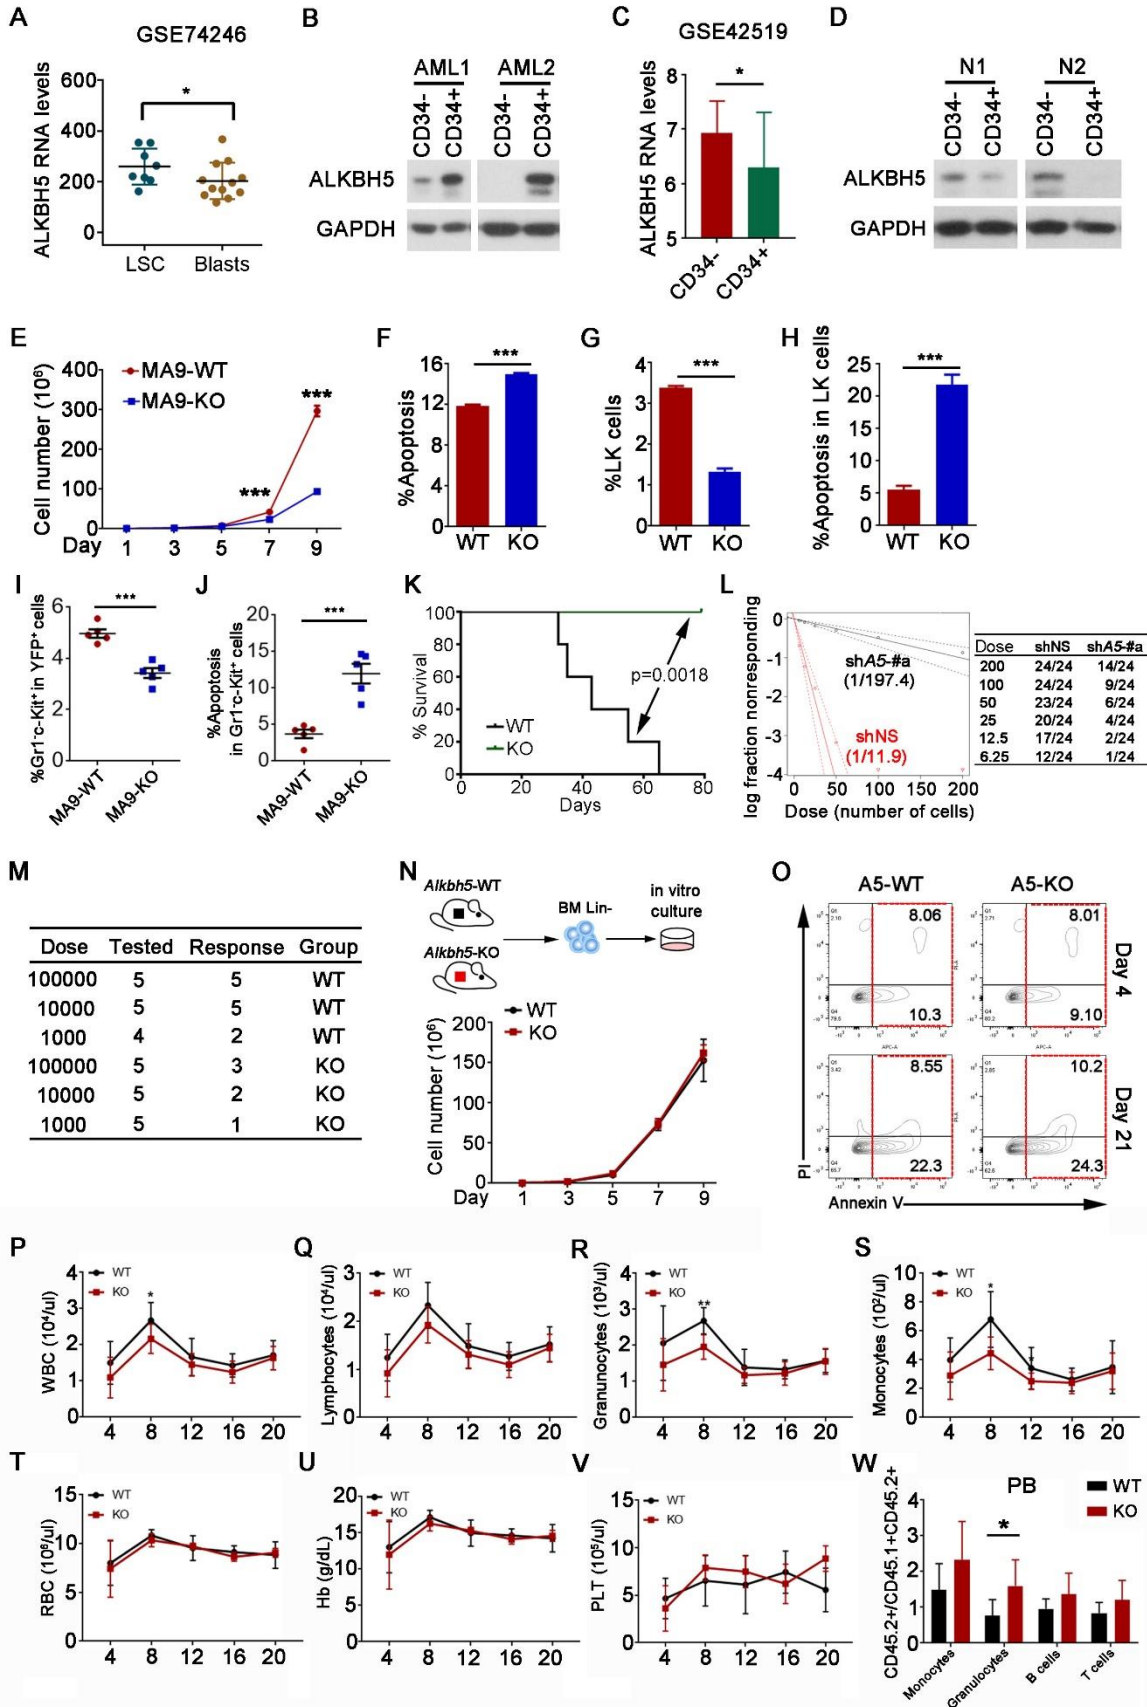

**Figure S4 (related to Figure 4). Effects of *Alkbh5* knockout on the self-renewal/maintenance of leukemia stem/initiating cells (LSCs/LICs) and normal hematopoiesis.**

(A) Comparison of *ALKBH5* expression levels between human primary leukemia stem cells (LSCs) and bunk AML cells (blasts), based on the GSE74246 dataset.

(B) Western blots showing ALKBH5 protein levels in CD34<sup>-</sup> and CD34<sup>+</sup> cell compartments isolated from leukemic BM cells of two primary AML patients. GAPDH was used as a loading control.

(C) Comparison of *ALKBH5* expression levels between human CD34<sup>-</sup> and CD34<sup>+</sup> cell compartments isolated from healthy controls (n=22), based on the GSE42519 dataset.

(D) Western blots showing ALKBH5 protein levels in CD34<sup>-</sup> and CD34<sup>+</sup> cell compartments isolated from two healthy donors (N1 and N2). GAPDH was used as a loading control.

(E-H) Effects of *Alkbh5* knockout on the proliferation/growth and apoptosis of MA9-transformed BM hematopoietic stem/progenitor cells (HSPCs). BM lin<sup>-</sup> cells from *Alkbh5* wild-type (WT) or homozygous knockout (KO) mice were transduced with MA9-YFP retrovirus and then cultured *in vitro*. (E) Proliferation assays of the transduced cells. (F) The percentage of apoptotic cells. (G) The percentage of lin<sup>-</sup>c-kit<sup>+</sup> (LK) cells. (H) The percentage of apoptotic LK cells. F-H were detected by flow cytometry.

(I-J) Comparison of Gr-1<sup>-</sup>c-Kit<sup>+</sup> cell percentages in YFP<sup>+</sup> BM cells (I) and the apoptotic cell percentages in Gr-1<sup>-</sup>c-Kit<sup>+</sup> cells (J) between primary mouse MA9 AML cells with *Alkbh5* wild-type (MA9-WT) or homozygous knockout (MA9-KO). Primary leukemic BM cells were collected from recipients shown in Figure 4A.

(K) Kaplan–Meier survival curves of secondary recipients (n=5 for each group) transplanted with leukemic BM cells collected from primary leukemic recipients shown in Figure 2F. The p value was detected by the log-rank test.

(L) *In vitro* limiting dilution assays (LDAs). Mouse MA9 cells were transduced with an *Alkbh5* shRNA (shA5-#a) or control shRNA (shNS) and then seeded into 48-well plates at different doses with 24 replicates per dose. Colony forming cell counts were checked 7 days post seeding. (Left panel) Logarithmic plot showing the percentage of non-responding wells plated at different doses. Non-responding wells: wells not showing MA9 clones 7 days post plating. (Right panel) Table showing the number of wells containing colony forming cells. The estimated LSC/LIC frequency is calculated by ELDA and shown on the plot.

**(M)** Information of the response rates in the *in vivo* limiting dilution assays. Dose, number of donor cells; tested, total number of mice used in the assay; response, mice developed leukemia within 6 weeks post 2<sup>nd</sup> BMT.

**(N-O)** Effects of *Alkbh5* knockout on the growth/proliferation (**N**) and apoptosis (**O**) of normal mouse HSPCs. BM  $\text{lin}^-$  cells (HSPCs) were isolated from *Alkbh5* wild-type (WT) and homozygous knockout (KO) mice and cultured *in vitro* for the analysis.

**(P-W)** *In vivo* competition assays. **(P-V)** CBC counts of recipients PB every 4 weeks. **(W)** Ratio of  $\text{CD45.2}^+/\text{CD45.1}^+\text{CD45.2}^+$  in the differentiated cell compartments in the PB of recipients.

Mean $\pm$ SD are shown for Figures S4A, C, E-J, N, P-W, \* $p < 0.05$ ; \*\*\* $p < 0.001$ ; t-test.

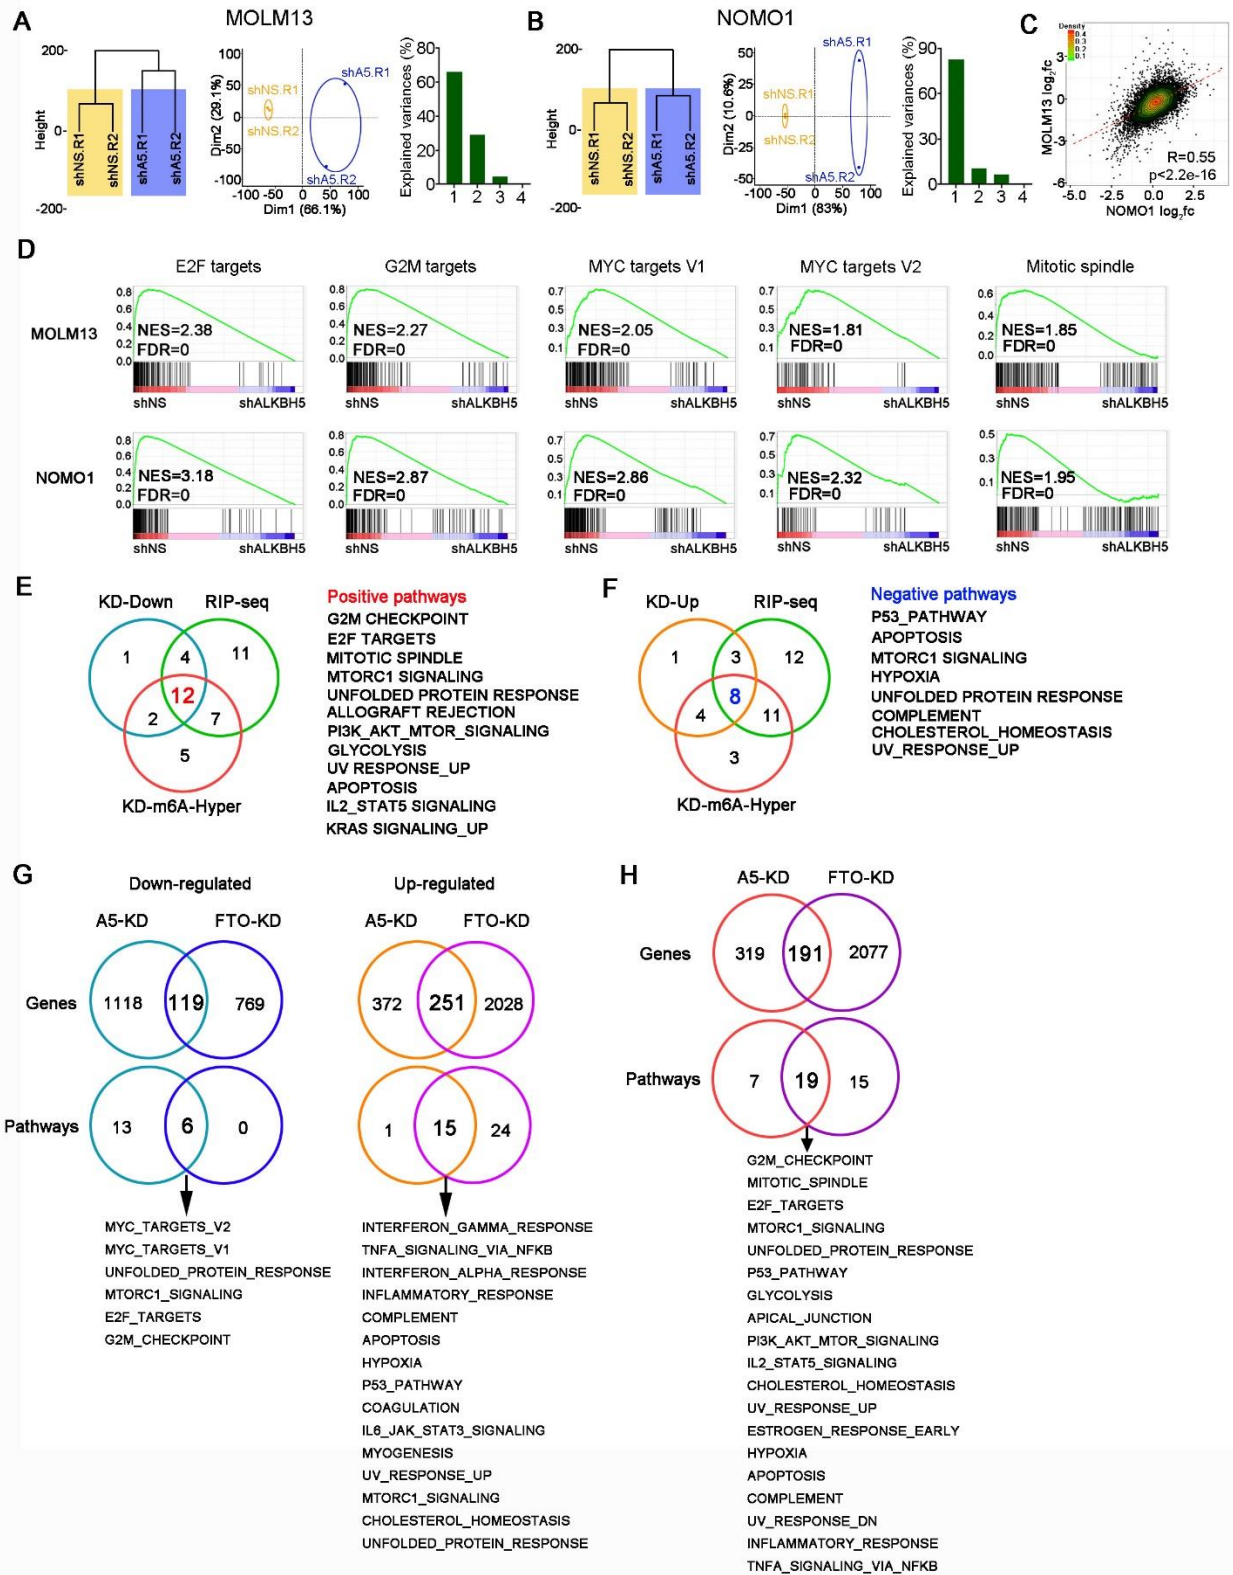

**Figure S5 (related to Figure 5). Transcriptome-wide identification of ALKBH5 targets.**

(A-B) Hierarchical clustering and principal component analysis (PCA) of control (shNS.R1 and shNS.R2) and *ALKBH5* knockdown (shA5.R1 and shA5.R2) MOLM13 (A) and NOMO1 (B) AML cells based on the RNA-seq data.

(C) Scatterplots of expression fold changes of genes upon *ALKBH5* knockdown in MOLM13 and NOMO1 cells based on the RNA-seq data.

(D) Gene set enrichment analysis (GSEA) in MOLM13 and NOMO1 cells. Representative gene sets (pathways) that are significantly enriched (FDR<0.001) with genes downregulated in AML cells upon *ALKBH5* knockdown were shown. NES, normalized enrichment score; FDR, false discovery rate.

(E-F) Venn diagram of pathways that were positively (E) or negatively (F) regulated by *ALKBH5* in human AML cells. KD-Down/Up: pathways of genes down/up-regulated in *ALKBH5* knockdown RNA-seq samples. RIP-seq, pathways of genes whose transcripts significantly enriched with *ALKBH5* in Flag-IP samples. KD-m<sup>6</sup>A-Hyper: pathways of genes with increased m<sup>6</sup>A abundance in *ALKBH5* knockdown samples. Only pathways with FDR<0.01 were used for the overlapping analysis.

(G) Comparison of down- or up-regulated genes (RPKM>1, fold change>1.5) and pathways (FDR<0.01) caused by *FTO* knockdown (based on the RNA-seq data from (Huang et al., 2019)) with those caused by *ALKBH5* knockdown (based on the RNA-seq data herein).

(H) Comparison of m<sup>6</sup>A hypermethylated genes (p<0.05) and pathways (FDR<0.01) caused by *FTO* knockdown (based on the m<sup>6</sup>A-seq data from (Su et al., 2018)) with those caused by *ALKBH5* knockdown (based on the m<sup>6</sup>A-seq data herein).

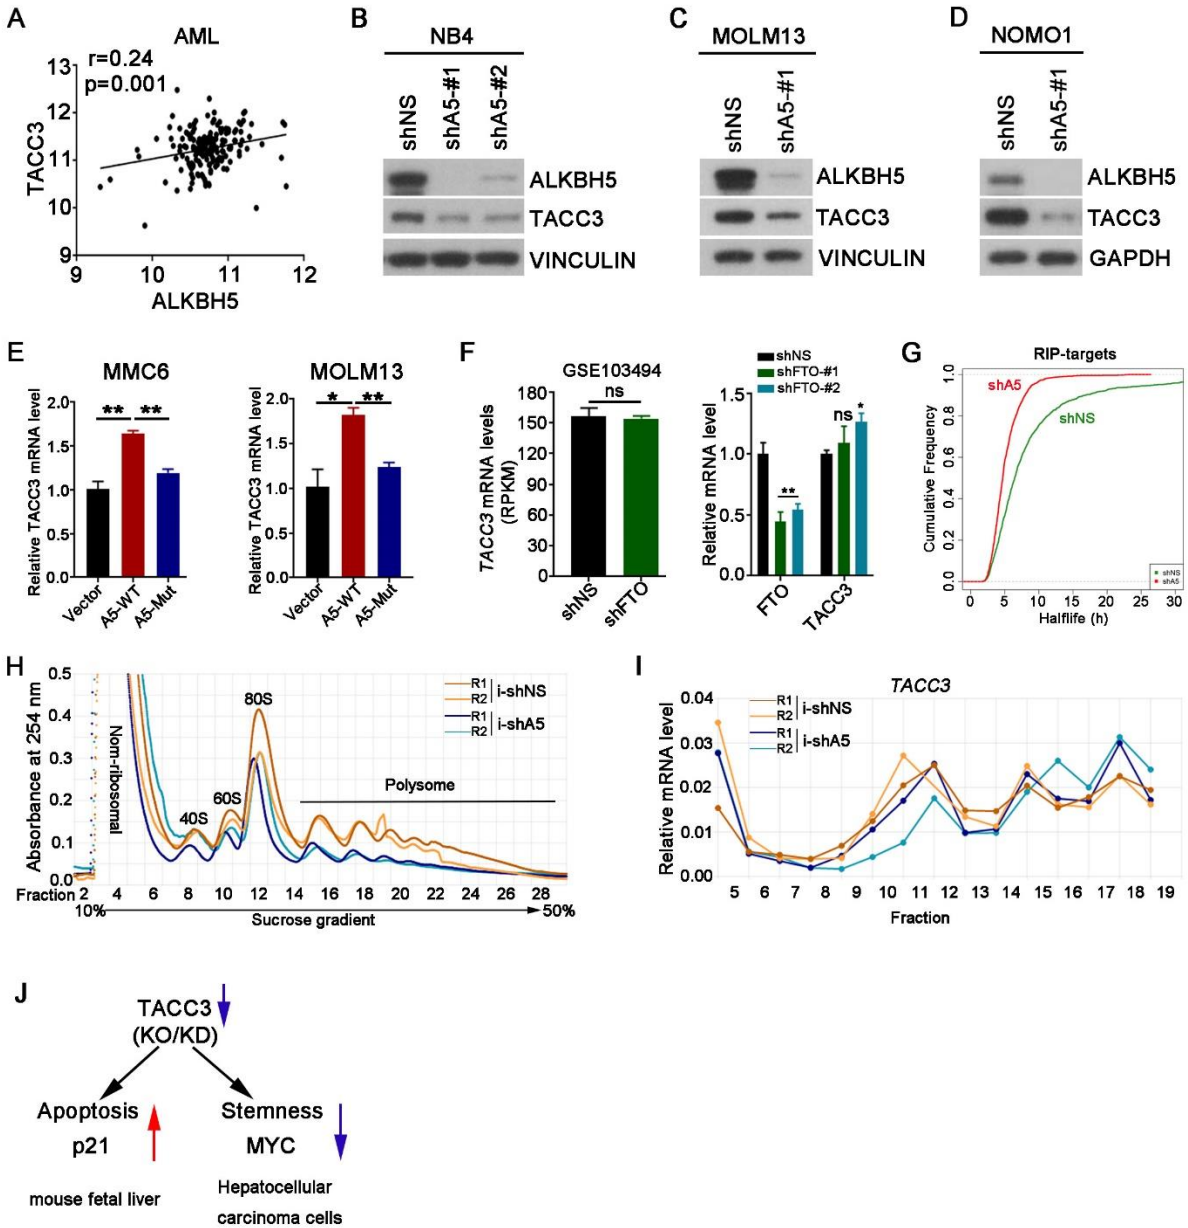

**Figure S6 (related to Figure 6). ALKBH5 regulates *TACC3* expression via affecting its mRNA stability**

(A) The correlation of *TACC3* with *ALKBH5* in expression across human AML samples in the TCGA-AML dataset (n=177). Pearson correlation analysis was conducted. r, correlation coefficient.

**(B-D)** Western blots of ALKBH5 and TACC3 in NB4 (**B**), MOLM13 (**C**) and NOMO1 (**D**) cells transduced with shNS or *ALKBH5* shRNAs. VINCULIN or GAPDH was used as a loading control. **(E)** qPCR detection of *TACC3* expression changes in ALKBH5 wild-type (A5-WT)- or ALKBH5-mutant (A5-Mut)-overexpressing AML cells, relative to their controls. **(F)** Effect of *FTO* knockdown on *TACC3* RNA level in AML cells. (Left panel) *TACC3* mRNA level in the control (shNS) or *FTO* knockdown (shFTO) NB4 cells based on the RNA-seq dataset (GSE103494). (Right panel) qPCR detection of *FTO* and *TACC3* mRNA levels in MMC6 cells transduced with shNS or *FTO* shRNAs (shFTO-#1 and shFTO-#2). **(G)** Cumulative distribution of RNA transcript stability changes of ALKBH5 RIP targets between shNS- and shA5-#1-transduced NOMO1 cells. **(H-I)** Polysome profiling assays. **(H)** Absorbance of different fractions of NOMO1 cell lysates. **(I)** Total RNAs in different fractions of ribosomes were extracted and subjected to qPCR analysis, *TACC3* mRNA level was normalized to *GAPDH* and input. **(J)** Summary of previous reports about the effects of TACC3 on expression of p21 and MYC. *Tacc3* knockout caused apoptosis in mouse fetal liver with increased p21 expression (Piekorz et al., 2002; Schneider et al., 2008; Suhail et al., 2015). *TACC3* knockdown suppressed cell proliferation and stem-like phenotype of hepatocellular carcinoma cells *in vitro* with decreased MYC expression (Zhou et al., 2015).

Mean±SD are shown for Figures S6E-F, \*p<0.05; \*\*p <0.01; ns, no significance; t-test.

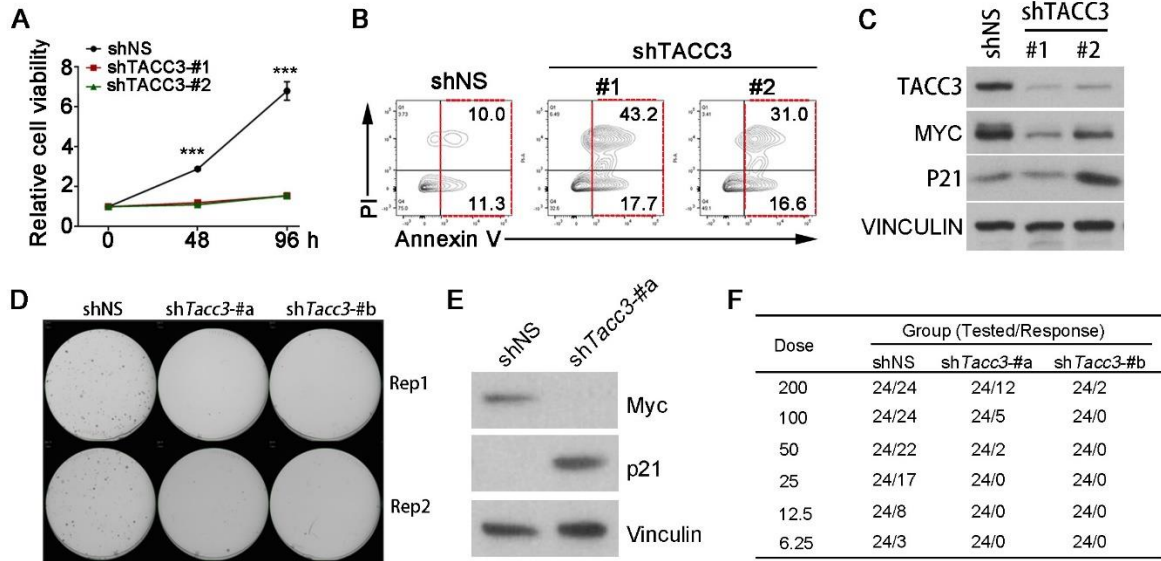

**Figure S7 (related to Figure 7). *TACC3* is a functionally important target of ALKBH5 in AML.**

(A) Effect of *TACC3* knockdown by shRNAs (shTACC3-#1 and shTACC3-#2) on the viability/proliferation of MOLM13 cells.

(B) Percentage of apoptotic cells in MOLM13 cells transduced with shNS or individual *TACC3* shRNAs.

(C) Western blots of *TACC3*, *MYC* and *P21* in MOLM13 cells transduced with shNS or individual *TACC3* shRNAs. *VINCULIN* was used as a loading control.

(D) Whole dish scanning pictures of mouse MA9 AML cells transduced with shNS or individual *Tacc3* shRNAs (shTacc3-#a and shTacc3-#b) in colony forming/replating assays (Figure 7G).

(E) Western blots of *Myc* and *p21* in mouse MA9 AML cells transduced with shNS or *Tacc3* shRNA (shTacc3-#a). *Vinculin* was used as a loading control.

(F) Table for the *in vitro* limiting dilution assays (LDAs) shown in Figure 7H. Dose, number of cells seeded into each well. Tested, total replicate wells plated. Response, wells contain colony forming cells.

Mean±SD are shown for Figure S7A, \*\*\* $p < 0.001$ ; t-test.



## Supplemental Tables

**Table S1 (Related to Figure 5). List of the 18 highly confident target genes of ALKBH5 in AML as detected by transcriptome-wide RNA-seq, RIP-seq and m<sup>6</sup>A-seq.**

| Correlation with ALKBH5 in expression | Gene            | Enriched pathways (Hallmark gene set) | Correlation with patient survival in the TCGA AML cohort | Fold change    |               |         |                      |
|---------------------------------------|-----------------|---------------------------------------|----------------------------------------------------------|----------------|---------------|---------|----------------------|
|                                       |                 |                                       |                                                          | RNA-seq MOLM13 | RNA-seq NOMO1 | RIP-seq | m <sup>6</sup> A-seq |
| Positive                              | <i>ADNP</i>     | N/A                                   | ns                                                       | 0.63           | 0.61          | 2.18    | 1.88                 |
|                                       | <i>CHAF1A</i>   | G2M Checkpoint                        | ns                                                       | 0.37           | 0.44          | 4.80    | 2.27                 |
|                                       | <i>CENPF</i>    | G2M Checkpoint<br>Mitotic Spindle     | ns                                                       | 0.05           | 0.15          | 2.39    | 3.53                 |
|                                       | <i>HNRNPF</i>   | N/A                                   | ns                                                       | 0.62           | 0.59          | 2.02    | 1.40                 |
|                                       | <i>MCM7</i>     | E2F Targets;<br>MYC Targets V1        | ns                                                       | 0.19           | 0.27          | 2.72    | 2.49                 |
|                                       | <i>MSH6</i>     | N/A                                   | ns                                                       | 0.23           | 0.54          | 3.61    | 3.97                 |
|                                       | <i>PHACTR3</i>  | N/A                                   | ns                                                       | 0.36           | 0.48          | 2.73    | 3.89                 |
|                                       | <i>PRKDC</i>    | E2F Targets                           | ns                                                       | 0.26           | 0.30          | 4.21    | 1.82                 |
|                                       | <i>SLC43A3</i>  | N/A                                   | ns                                                       | 0.62           | 0.63          | 4.07    | 2.00                 |
|                                       | <i>TACC3</i>    | E2F Targets;<br>G2M Checkpoint        | Poor;<br>p=0.0094                                        | 0.38           | 0.46          | 3.56    | 2.38                 |
| Negative                              | <i>USP10</i>    | N/A                                   | ns                                                       | 0.51           | 0.49          | 3.67    | 2.36                 |
|                                       | <i>WHSC1</i>    | N/A                                   | ns                                                       | 0.17           | 0.43          | 7.23    | 2.08                 |
|                                       | <i>BCL2A1</i>   | Apoptosis                             | Poor;<br>p=0.0032                                        | 3.04           | 2.10          | 3.00    | 1.91                 |
|                                       | <i>CLCN7</i>    | N/A                                   | ns                                                       | 1.86           | 1.93          | 6.08    | 1.45                 |
|                                       | <i>DMXL2</i>    | N/A                                   | ns                                                       | 1.52           | 2.12          | 11.56   | 2.57                 |
|                                       | <i>KIAA0930</i> | N/A                                   | ns                                                       | 1.56           | 1.91          | 2.14    | 1.54                 |
|                                       | <i>SAT2</i>     | N/A                                   | ns                                                       | 3.42           | 2.67          | 2.25    | 2.75                 |
|                                       | <i>TFEB</i>     | N/A                                   | Poor;<br>p=0.0024                                        | 1.58           | 2.08          | 2.74    | 1.35                 |

N/A, not enriched in Hallmark gene sets. p, p value; ns, not significant (p<0.05). Poor, significantly shorter overall survival time of AML patients with expression levels of a given gene higher than 50% of the cohort (median). Fold change: RNA-seq and m<sup>6</sup>A-seq, shA5/shNS; RIP-seq, IP/input.

**Table S2 (Related to Star Method). List of oligonucleotides**

| Name             | Sequence                |                              |
|------------------|-------------------------|------------------------------|
| <i>Alkbh5</i> -F | CGGCCTCAGGACATTAAGGA    | qPCR primers for mouse genes |
| <i>Alkbh5</i> -R | TCGCGGTGCATCTAATCTTG    |                              |
| <i>Tacc3</i> -F  | TGACCAATAAGCGTGAGGC     |                              |
| <i>Tacc3</i> -R  | CCATTTGAACCACAGGTGC     |                              |
| ADNP-F           | CCCAGATTGAGTGGCAGAATAG  | qPCR primers for human genes |
| ADNP-R           | AGGGAACCTGGCACTTAGG     |                              |
| ALKBH5-F         | TTTCTCTGGTGTGGTTCTGG    |                              |
| ALKBH5-R         | AAGTCTTAGTCTTCCCAGGATTG |                              |
| BCL2A1-F         | CTCAAGACTTTGCTCTCCACC   |                              |
| BCL2A1-R         | TGGTATCTGTAGGACGCACTG   |                              |
| CENPF-F          | GCTCAACACAGGAGGAAGTG    |                              |
| CENPF-R          | CGTTCTTTCAGTTTCTCTGCG   |                              |
| CHAF1A-F         | AACTTGTC AACGGGAAGGG    |                              |
| CHAF1A-R         | CGAGTCCTCTGTCAAATCAATG  |                              |
| CLCN7-F          | CCCTGTGCTGTGATGTTGAG    |                              |
| CLCN7-R          | ATTCCACGCTCTGAGGCTC     |                              |
| DMXL2-F          | CAAACCAACAGTAAGGATGGAG  |                              |
| DMXL2-R          | GAGAAACAGGCAGTGAAGGAG   |                              |
| GAPDH-F          | AATCCCATCACCATCTTCCAG   |                              |
| GAPDH-R          | AAATGAGCCCCAGCCTTC      |                              |
| HNRNPF-F         | ACTTCTTCTCTCCTCTCAACCC  |                              |
| HNRNPF-R         | AACTCAACATCTGCTTCACCC   |                              |
| KIAA0930-F       | AACTTCAGCACCCGAGTCAG    |                              |
| KIAA0930-R       | AGGGCAAAGCCATCAAAC      |                              |
| MCM7-F           | TGAACTCGGGAAGAAGCAG     |                              |
| MCM7-R           | TCGTCCAGGTCCACATACAG    |                              |
| MSH6-F           | GGATTGGTAGGAACCGTTAC    |                              |
| MSH6-R           | TCGTTTACAGCCCTTCTTG     |                              |
| WHSC1-F          | CGTTCTGTAAGGAGCACCAG    |                              |
| WHSC1-R          | GCTATTTGCCCTCTGTGACTC   |                              |
| PHACTR3-F        | CACTTCCTTCCTTCTTTGGTG   |                              |
| PHACTR3-R        | CCGTCCTCCATTACTGC       |                              |
| SAT2-F           | TTCAAGGAGAGGCAACGAG     |                              |
| SAT2-R           | GGGAAGGAGAACTCAAGACAG   |                              |
| SLC43A3-F        | CTCCACCACCTTTGAGGAC     |                              |
| SLC43A3-R        | CTGCTTGCAACTGAGATTC     |                              |
| TACC3-F          | AAGAAGTGGCTGCAGGCC      |                              |
| TACC3-R          | TGGGGGTGCCCTTTTGC       |                              |
| TFEB-F           | CCAAGAAGGATCTGGACCTC    |                              |

|                    |                           |      |
|--------------------|---------------------------|------|
| TFEB-R             | GGACATGGTGGACAGAAGTG      |      |
| USP10-F            | TTTGGTCAGTCCTGCTTCC       |      |
| USP10-R            | ATGCTTTCCGTGGTGTGC        |      |
| 28S rRNA-F         | TGTCGGCTCTTCCTATCATTGT    |      |
| 28S rRNA-R         | ACCCAGCTCACGTTCCCTATTA    |      |
| ACTB-F             | CACTCTTCCAGCCTTCCTTC      |      |
| ACTB-R             | GTACAGGTCTTTGCGGATGT      |      |
| sgALKBH5-sense     | CACCGCGTGGACGAGATCCCCGAGT | gRNA |
| sgALKBH5-antisense | AAACACTCGGGGATCTCGTCCACGC |      |
